# Supplementary material for: Highly Basic Clusters in the Herpes Simplex Virus 1 Nuclear Egress Complex Drive Membrane Budding by Inducing Lipid Ordering
Source: PubMed Central journal article supplement (PMC8406295; doi:10.1128/mbio.01548-21), 2021-08-24
Supplement: mbio.01548-21-sf003.pdf [file mbio.01548-21-sf003.pdf]

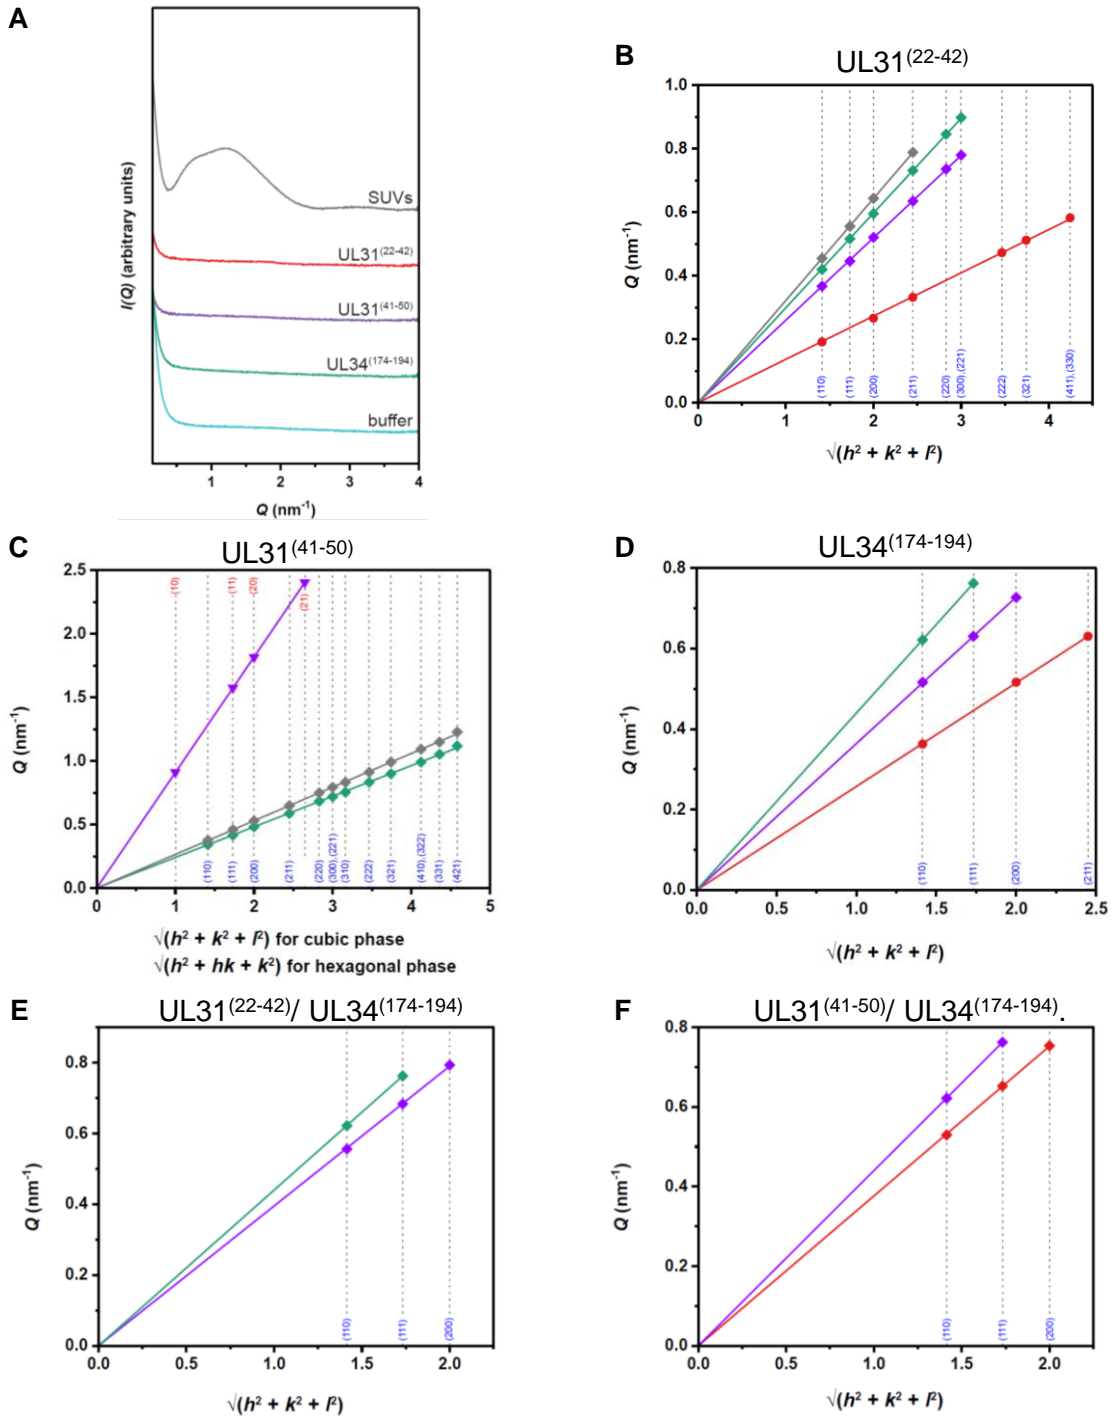

**Supplementary Fig. S3. SAXS spectra for control and indexing of the identified liquid-crystalline lipid phases.** (A) Spectra for SUVs in buffer, individual peptides in buffer, and buffer-only controls. For improved visualization, spectra have been manually offset in the vertical direction by scaling each trace by a multiplicative factor. Linear regressions of indexed reflections for phases induced by (B) UL31<sup>(22-42)</sup>, (C) UL31<sup>(41-50)</sup>, (D) UL34<sup>(174-194)</sup>, (E) UL31<sup>(22-42)</sup>/ UL34<sup>(174-194)</sup>, and (F) UL31<sup>(41-50)</sup>/ UL34<sup>(174-194)</sup>. (B–F) Vertical dotted reference lines denote indexed reflections. Each plotted point corresponds to an indexed peak, with its associated lattice indicated by the marker symbol (circle = *Im3m* cubic, diamond = *Pn3m* cubic, triangle = hexagonal). Colors of each regression correspond to the same ch P/L values in Fig. 7. Calculated lattice parameters and NGC values for the identified phases are provided in Supplementary Fig. S4.
