# Supplementary material for: Highly Basic Clusters in the Herpes Simplex Virus 1 Nuclear Egress Complex Drive Membrane Budding by Inducing Lipid Ordering
Source: PubMed Central journal article supplement (PMC8406295; doi:10.1128/mbio.01548-21), 2021-08-24
Supplement: mbio.01548-21-sf004.pdf [file mbio.01548-21-sf004.pdf]

**UL31<sup>(22-42)</sup>**

| Charge P/L       | 1/4   | 1/2                                                        | 1/1                                                        | 3/2                                                        | 2/1                                                        |
|------------------|-------|------------------------------------------------------------|------------------------------------------------------------|------------------------------------------------------------|------------------------------------------------------------|
| Molar P/L        | 1/140 | 1/70                                                       | 1/35                                                       | 3/70                                                       | 2/35                                                       |
| <b>Cubic</b>     | ----- | <i>Im3m</i> : 46.08 nm<br> <K>  = 5.05e-3 nm <sup>-2</sup> | <i>Pn3m</i> : 24.20 nm<br> <K>  = 1.12e-2 nm <sup>-2</sup> | <i>Pn3m</i> : 21.04 nm<br> <K>  = 1.48e-2 nm <sup>-2</sup> | <i>Pn3m</i> : 19.54 nm<br> <K>  = 1.72e-2 nm <sup>-2</sup> |
| <b>Hexagonal</b> | ----- | -----                                                      | -----                                                      | -----                                                      | -----                                                      |
| <b>Lamellar</b>  | ----- | 7.17 nm                                                    | 6.43 nm                                                    | 6.26 nm                                                    | 6.20 nm                                                    |

**UL31<sup>(41-50)</sup>**

| Charge P/L       | 1/4   | 1/2   | 1/1     | 3/2                                                        | 2/1                                                        |
|------------------|-------|-------|---------|------------------------------------------------------------|------------------------------------------------------------|
| Molar P/L        | 1/80  | 1/40  | 1/20    | 3/40                                                       | 1/10                                                       |
| <b>Cubic</b>     | ----- | ----- | -----   | <i>Pn3m</i> : 26.09 nm<br> <K>  = 9.62e-3 nm <sup>-2</sup> | <i>Pn3m</i> : 23.73 nm<br> <K>  = 1.16e-2 nm <sup>-2</sup> |
| <b>Hexagonal</b> | ----- | ----- | 7.98 nm | -----                                                      | -----                                                      |
| <b>Lamellar</b>  | ----- | ----- | -----   | -----                                                      | -----                                                      |

**UL34<sup>(174-194)</sup>**

| Charge P/L       | 1/4     | 1/2                                                        | 1/1                                                        | 3/2                                                        | 2/1     |
|------------------|---------|------------------------------------------------------------|------------------------------------------------------------|------------------------------------------------------------|---------|
| Molar P/L        | 1/140   | 1/70                                                       | 1/35                                                       | 3/70                                                       | 2/35    |
| <b>Cubic</b>     | -----   | <i>Im3m</i> : 24.41 nm<br> <K>  = 1.80e-2 nm <sup>-2</sup> | <i>Pn3m</i> : 17.26 nm<br> <K>  = 2.20e-2 nm <sup>-2</sup> | <i>Pn3m</i> : 14.28 nm<br> <K>  = 3.21e-2 nm <sup>-2</sup> | -----   |
| <b>Hexagonal</b> | -----   | -----                                                      | -----                                                      | -----                                                      | -----   |
| <b>Lamellar</b>  | 7.92 nm | 6.86 nm                                                    | 6.07 nm                                                    | 6.00 nm                                                    | 6.02 nm |

**UL31<sup>(22-42)</sup> / UL34<sup>(174-194)</sup>**

| UL31 <sup>(22-42)</sup>   | Molar P/L = 1/35                                           | Molar P/L = 3/70                                           |
|---------------------------|------------------------------------------------------------|------------------------------------------------------------|
| UL34 <sup>(174-194)</sup> | Molar P/L = 1/35                                           | Molar P/L = 3/70                                           |
| <b>Cubic</b>              | <i>Pn3m</i> : 15.91 nm<br> <K>  = 2.59e-2 nm <sup>-2</sup> | <i>Pn3m</i> : 14.28 nm<br> <K>  = 3.21e-2 nm <sup>-2</sup> |
| <b>Hexagonal</b>          | -----                                                      | -----                                                      |
| <b>Lamellar</b>           | 6.02 nm                                                    | 6.00 nm                                                    |

**UL31<sup>(41-50)</sup> / UL34<sup>(174-194)</sup>**

| UL31 <sup>(41-50)</sup>   | Molar P/L = 1/40                                           | Molar P/L = 1/20                                           |
|---------------------------|------------------------------------------------------------|------------------------------------------------------------|
| UL34 <sup>(174-194)</sup> | Molar P/L = 1/35                                           | Molar P/L = 3/70                                           |
| <b>Cubic</b>              | <i>Pn3m</i> : 16.70 nm<br> <K>  = 2.35e-2 nm <sup>-2</sup> | <i>Pn3m</i> : 14.28 nm<br> <K>  = 3.21e-2 nm <sup>-2</sup> |
| <b>Hexagonal</b>          | -----                                                      | -----                                                      |
| <b>Lamellar</b>           | 6.02 nm                                                    | 5.97 nm                                                    |

**Supplementary Fig. S4. Phase diagram with tabulated lattice parameters and negative Gaussian curvature values for each SAXS condition.** Cells containing dashed lines indicate that the phase was either not present or could not be indexed due to insufficient number of reflections.
