# Supplementary material for: Highly Basic Clusters in the Herpes Simplex Virus 1 Nuclear Egress Complex Drive Membrane Budding by Inducing Lipid Ordering
Source: PubMed Central journal article supplement (PMC8406295; doi:10.1128/mbio.01548-21), 2021-08-24
Supplement: mbio.01548-21-sf005.pdf [file mbio.01548-21-sf005.pdf]

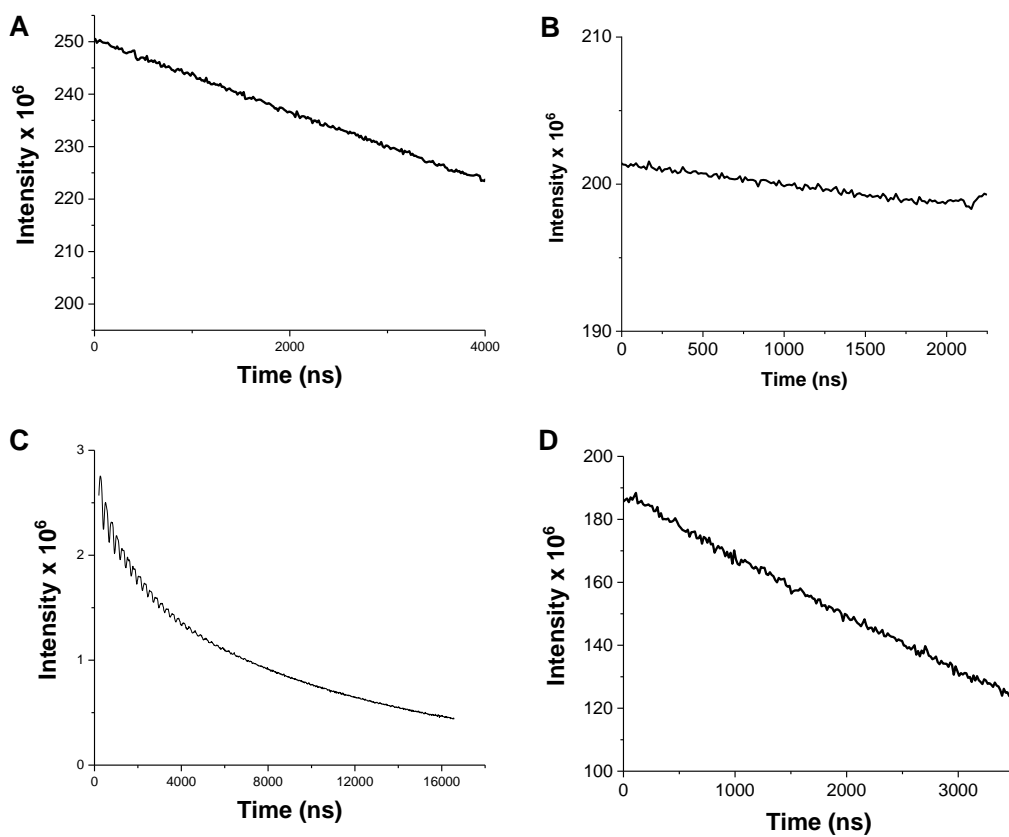

**Supplementary Fig. S5. DEER and spin echo signals.** (A) DEER signal for UL31<sup>(C1-50)</sup> in membranes. (B) DEER signal for UL34<sup>(174-194)</sup> in membranes (C) Spin echo signal for UL31<sup>(C1-50)</sup> in membranes. (D) DEER signal for UL31<sup>(C1-50)</sup>/UL34<sup>(174-194)</sup> in solution.
