# Supplementary material for: Highly Basic Clusters in the Herpes Simplex Virus 1 Nuclear Egress Complex Drive Membrane Budding by Inducing Lipid Ordering
Source: PubMed Central journal article supplement (PMC8406295; doi:10.1128/mbio.01548-21), 2021-08-24
Supplement: mbio.01548-21-st001.pdf [file mbio.01548-21-st001.pdf]

| Parameter <sup>a</sup>                                                                 | Value  | 68% CI <sup>b</sup> |
|----------------------------------------------------------------------------------------|--------|---------------------|
| Sample broadening factor                                                               | 1.98   | [1.93, 2.03]        |
| SiO <sub>2</sub> thickness (Å)                                                         | 10.0   | [6.1, 25.7]         |
| Cr thickness (Å)                                                                       | 17.6   | [8.2, 32.6]         |
| Gold thickness (Å)                                                                     | 138.9  | [133.9, 149.2]      |
| SiO <sub>2</sub> SLD (10 <sup>-6</sup> Å <sup>-2</sup> )                               | 3.6    | [2.0, 4.3]          |
| Cr SLD (10 <sup>-6</sup> Å <sup>-2</sup> )                                             | 3.3    | [2.6, 3.6]          |
| Au SLD (10 <sup>-6</sup> Å <sup>-2</sup> )                                             | 4.42   | [4.38, 4.46]        |
| Tether length (Å)                                                                      | 4.3    | [3.0, 5.3]          |
| Inner leaflet lipid length (Å)                                                         | 15.3   | [14.9, 17.5]        |
| Outer leaflet lipid length (Å)                                                         | 10.15  | fixed <sup>c</sup>  |
| Change in lipid thickness with protein (Å) <sup>d</sup>                                | 0.49   | [0.33, 0.66]        |
| Fraction of exchangeable protons exchanged                                             | 0.921  | [0.904, 0.960]      |
| Number fraction of tether molecules in inner leaflet                                   | 0.84   | [0.10, 0.93]        |
| Ratio of b-mercaptoethanol to tether molecules                                         | 5.1    | [1.3, 8.6]          |
| Fractional completeness of bare bilayer                                                | 0.999  | [0.988, 1.000]      |
| Fractional completeness of bilayer with protein                                        | 0.985  | [0.973, 0.989]      |
| Number of protein molecules per outer leaflet lipid                                    | 0.022  | [0.021, 0.023]      |
| Distance of protein from headgroups (Å)                                                |        | e                   |
| Euler angle a                                                                          |        |                     |
| Euler angle b                                                                          |        |                     |
| MPR length                                                                             | 28.9   |                     |
| MPR fractional position <sup>f</sup>                                                   | 0.097  | [0.020, 0.240]      |
| Fraction of protein bound in H <sub>2</sub> O spectrum                                 | 0.917  | [0.870, 0.960]      |
| SLD of D <sub>2</sub> O solvent, bare bilayer (10 <sup>-6</sup> Å <sup>-2</sup> )      | 6.25   | [6.17, 6.32]        |
| SLD of H <sub>2</sub> O solvent, bare bilayer (10 <sup>-6</sup> Å <sup>-2</sup> )      | -0.564 | [-0.565, -0.559]    |
| SLD of D <sub>2</sub> O solvent, bilayer + protein (10 <sup>-6</sup> Å <sup>-2</sup> ) | 6.24   | [6.17, 6.31]        |
| SLD of H <sub>2</sub> O solvent, bilayer + protein (10 <sup>-6</sup> Å <sup>-2</sup> ) | -0.345 | [-0.390, -0.310]    |
| Global roughness parameter (Å)                                                         | 3.39   | [3.04, 4.41]        |
| Roughness of Cr/Au interface (Å)                                                       | 14.1   | [11.0, 18.2]        |
| Roughness of bilayer (Å)                                                               | 4.34   | [3.79, 4.74]        |
| Angle alignment correction (°)                                                         | 0.000  | [-0.003, 0.003]     |
| Fractional beam intensity                                                              | 0.959  | [0.956, 0.961]      |
| Background × 10 <sup>-6</sup> , D <sub>2</sub> O solvent, bare bilayer                 | -0.089 | [-0.230, 0.050]     |
| Background × 10 <sup>-6</sup> , H <sub>2</sub> O solvent, bare bilayer                 | 2.90   | [2.68, 3.18]        |
| Background × 10 <sup>-6</sup> , D <sub>2</sub> O solvent, bilayer + protein            | -0.43  | [-0.60, -0.23]      |
| Background × 10 <sup>-6</sup> , H <sub>2</sub> O solvent, bilayer + protein            | 2.69   | [2.47, 2.97]        |

**Supplementary Table S1.** Parameters of the NR orientation model for 500 nm NEC220.

<sup>a</sup> For clarity, parameters for the Catmull-Rom freeform spline model are not shown.

<sup>b</sup> 68% confidence intervals are calculated from the stable solution to the MCMC optimization.

<sup>c</sup> Based on control measurement of bilayer alone.

<sup>d</sup> Defined in the model as the change in the inner lipid leaflet thickness.

<sup>e</sup> The two Euler angles a and b and the protein depth are highly correlated and are not reported as a value with standard errors. See Fig. 3E, G.

<sup>f</sup> The MPR was constrained to be near to the globular part of the protein. This parameter ranges from 1 (full extension of the MPR from the globular part of the protein) to 0 (full overlap of the MPR with the globular domains).
