# Supplementary material for: Highly Basic Clusters in the Herpes Simplex Virus 1 Nuclear Egress Complex Drive Membrane Budding by Inducing Lipid Ordering
Source: PubMed Central journal article supplement (PMC8406295; doi:10.1128/mbio.01548-21), 2021-08-24
Supplement: mbio.01548-21-st002.pdf [file mbio.01548-21-st002.pdf]

| Peptide                            | Sequence                                                                          |
|------------------------------------|-----------------------------------------------------------------------------------|
| UL31 <sup>(41-50)</sup>            | <sup>41</sup> RKSLPPHARK <sup>50</sup>                                            |
| UL31 <sup>(C40-50)</sup>           | <sup>40</sup> CRKSLPPHARK <sup>50</sup>                                           |
| UL31 <sup>(41-C51)</sup>           | <sup>41</sup> RKSLPPHARKC <sup>51</sup>                                           |
| UL31 <sup>scr(41-C51)</sup>        | <sup>41</sup> KSPKLHRARPC <sup>51</sup>                                           |
| UL31 <sup>(C40-50 R41S/K42S)</sup> | <sup>40</sup> CSSSLPPHARK <sup>50</sup>                                           |
| UL31 <sup>(22-42)</sup>            | <sup>22</sup> RRSRSSAAGGTLGVVRRASRK <sup>42</sup>                                 |
| UL31 <sup>(C21-42)</sup>           | <sup>21</sup> CRRSRSSAAGGTLGVVRRASRK <sup>42</sup>                                |
| UL31 <sup>(22-C43)</sup>           | <sup>22</sup> RRSRSSAAGGTLGVVRRASRK <sup>43</sup>                                 |
| UL31 <sup>scr(22-C43)</sup>        | <sup>22</sup> ARLGRSTSRGKSRAVRSVGRAC <sup>43</sup>                                |
| UL31 <sup>(1-50)</sup>             | <sup>1</sup> MYDTPHRRGSRPGPYHGKERRRSRSSAAGGTLGVVRRASR<br>KSLPPHARK <sup>50</sup>  |
| UL31 <sup>(C1-50)</sup>            | <sup>1</sup> CYDTPHRRGSRPGPYHGKERRRSRSSAAGGTLGVVRRASR<br>KSLPPHARK <sup>50</sup>  |
| UL31 <sup>(1-C51)</sup>            | <sup>1</sup> MYDTPHRRGSRPGPYHGKERRRSRSSAAGGTLGVVRRASR<br>KSLPPHARKC <sup>51</sup> |
| UL34 <sup>(174-194)</sup>          | <sup>174</sup> AGRTRRILCRAAEQAITRRR <sup>194</sup>                                |
| UL34 <sup>scr(174-194)</sup>       | <sup>174</sup> TRITRQCRAARGRERAARIL <sup>194</sup>                                |

**Supplementary Table S2.** Sequences of UL31 and UL34 peptides used in CW-ESR experiments (Fig. 5)
