# Supplementary material for: Highly Basic Clusters in the Herpes Simplex Virus 1 Nuclear Egress Complex Drive Membrane Budding by Inducing Lipid Ordering
Source: PubMed Central journal article supplement (PMC8406295; doi:10.1128/mbio.01548-21), 2021-08-24
Supplement: mbio.01548-21-st003.pdf [file mbio.01548-21-st003.pdf]

| Plasmid | Construct Info                                   | Forward Primer                                                                              | Reverse Primer                                                            |
|---------|--------------------------------------------------|---------------------------------------------------------------------------------------------|---------------------------------------------------------------------------|
| pJB02   | HSV1 UL34 1-220                                  | 5'-aaaaaag <u>tcgac</u> cctatggcgggactgggcaag-3'<br>Sall                                    | 5'-aaaaaagcggccgccttcagccccctggccc-3'<br>NotI                             |
| pJB57   | HSV1 UL34 1-220-His <sub>8</sub>                 | 5'-aaaaaag <u>tcgac</u> cctatggcgggactgggcaag-3'<br>Sall                                    | 5'-aaaaaagcggccgccttcagccccctggccc-3'<br>NotI                             |
| pJB84   | HSV UL34 1-185-His <sub>8</sub>                  | 5'-aaaaaag <u>tcgac</u> cctatggcgggactgggcaag-3'<br>Sall                                    | 5'-aaaaaagcggccgccttcagccccctggccc-3'<br>NotI                             |
| pKH90   | HSV1 UL31 f.l.                                   | 5'-agcaggatcctatgacaccgacccccat-3'<br>BamHI                                                 | 5'-aaatcgccgccttacggcggaggaaactc-3'<br>NotI                               |
| pKH86   | HSV1 UL31 51-306                                 | 5'-agcaggatcccaggagctgtgtttacac-3'<br>BamHI                                                 | 5'-aaatcgccgccttacggcggaggaaactc-3'<br>NotI                               |
| pJB41   | HSV1 UL31 41-306                                 | 5'-aaaaaag <u>gatccc</u> ggaagagcctgccg-3'<br>BamHI                                         | 5'-aaatcgccgccttacggcggaggaaactc-3'<br>NotI                               |
| pMT02   | HSV1 UL31-Δ40 R49S/K50S                          | 5'- <b>agc</b> caggagctgtgtttacacgagcgc-3'                                                  | 5'- <b>gct</b> ggcgtgaggcggcaggctctt-3'                                   |
| pMT08   | HSV1 UL31-Δ40<br>R41S/K42S/S43R/L44K/R49S/K50S   | 5'- <b>cgtaa</b> accgctcacgccagc-3'                                                         | 5'- <b>gctgct</b> ggaggatccgggccc-3'                                      |
| pMT09   | HSV1 UL31-Δ40<br>R41S/K42S/P45R/P46K/R49S/K50S   | 5'- <b>gctgct</b> ggaggatccgggccc-3'                                                        | 5'-agcct <b>gctaa</b> cacgccagcag-3'                                      |
| pMT10   | HSV1 UL31-Δ40<br>R41S/K42S/H47R/A48K/R49S/K50S   | 5'-agcctgccgcct <b>cgtaa</b> agc-3'                                                         | 5'- <b>gctgct</b> ggaggatccgggccc-3'                                      |
| pMT03   | HSV1 UL31-Δ40 R41S/K42S                          | 5'-aaaaaag <u>gatccc</u> tctctctagcctgccgc-3'<br>BamHI                                      | 5'-aaatcgccgccttacggcggaggaaactc-3'<br>NotI                               |
| pMT01   | HSV1 UL31-Δ40<br>R41S/K42S/R49S/K50S             | 5'-cctcacgcct <b>ctctc</b> caggagctgtgtt-3'                                                 | 5'-cggcaggct <b>agaag</b> aggaggatc-3'                                    |
| pMT17   | HSV1 UL31-Δ40 L44A                               | 5'-agc <b>gcg</b> ccgcctcacgcc-3'                                                           | 5'-ctccgggatccgggccc-3'                                                   |
| pMT11   | HSV1 UL31-Δ40 P45A/P46A                          | 5'-agcct <b>ggcggc</b> gcacgccccaaa-3'                                                      | 5'-ctccgggatccgggccc-3'                                                   |
| pMT18   | HSV1 UL31-Δ50 RKRK                               | 5'-agctgtgtctgcacgagcgc-3'                                                                  | 5'-cctgttt <b>gcttac</b> gggatccggg-3'                                    |
| pMT35   | HSV1 UL31-Δ40 Scr 41-50                          | 5'-<br><b>aaaagccc</b> aaactgcatctg <b>cgcg</b> tc <b>ccg</b> caggag<br>ctgtttacacgagcgc-3' | 5'-ggatccgggcccctggaaca-3'                                                |
| pMT04   | HSV1 UL31-Δ40 S43E                               | 5'- <b>gaact</b> gccgcctcacgc-3'                                                            | 5'-ctccgggatccgggccc-3'                                                   |
| pJB60   | HSV1 UL31 2-306<br>S11E/S24E/S26E/S27E/S40E/S43E | 5'-<br>ccccatcgccgcggc <b>gaa</b> cggcccggccctacac-<br>3'                                   | 5'-<br>gtgatagggcccgccg <b>ttc</b> gccgcggcgatgggg-<br>3';                |
|         | Round 2                                          | 5'-<br>gagcgcggcgg <b>gaa</b> cgc <b>gaaga</b> agcggccggcggg-<br>3'                         | 5'-cccgcggccg <b>cttctc</b> g <b>gtt</b> ccgccggcgctc-<br>3'              |
|         | Round 3                                          | 5'-<br>cgtggtgctcggg <b>ccgaa</b> cggaa <b>gaa</b> ctgccgcctc<br>acgcc-3'                   | 5'-<br>gggcgtagggcggcag <b>ttc</b> ctc <b>gtt</b> cgcccgacgc<br>accacg-3' |
| pMT16   | HSV-1 UL31 S11E/S24E/S43E                        | 5'-gcaaggagcgcggcgg <b>gaa</b> cgc-3'                                                       | 5'-cgtgataggcccgccg <b>ttc</b> gcc-3'                                     |
|         | Round 2                                          | 5'-gggccctatcacgcaaggagc-3'                                                                 | 5'-gggcc <b>gtt</b> cggcggcgatg-3'                                        |
| pMT19   | HSV-1 UL31 1-50                                  | 5'-aaaaaag <u>gatccc</u> tctctctatgacaccgacccc-3'<br>BamHI                                  | 5'-<br>aaaaaagcggccgcctattatttgcggcgtgaggcg-3'<br>NotI                    |
| pMT29   | HSV-1 UL31 C1-50                                 | 5'-ctgtccaggggcccgatc <b>tg</b> ctatg-3'                                                    | 5'-catag <b>cagg</b> atccgggcccctggaacag-3'                               |
|         | Round 2                                          | 5'-aggggcccggatc <b>tg</b> ctatgacaccgacc-3'                                                | 5'-ggtcgtgtcatag <b>cagg</b> atccgggcccct-3'                              |
|         | Round 3                                          | 5'-cagagattcaatgctgaaggagcgt-3'                                                             | 5'-accgctctcaagcattgaaatctctg-3'                                          |
| pMT33   | HSV-1 UL31 1-C51                                 | 5'-cacgccgcaaat <b>gcta</b> ataagcgc-3'                                                     | 5'-gccgctattag <b>catt</b> gcggcg-3'                                      |

**Supplementary Table S3. List of primers used for cloning described in Materials and Methods.** All primers are listed in the 5'-3' direction. Mutations are bolded, restriction digest sites are underlined and listed underneath applicable primers.
